# Supplementary material for: Downstream components of the calmodulin signaling pathway in the rice salt stress response revealed by transcriptome profiling and target identification
Source: PubMed Central journal article supplement (PMC6282272; doi:10.1186/s12870-018-1538-4), 2018-12-05

Figure S4

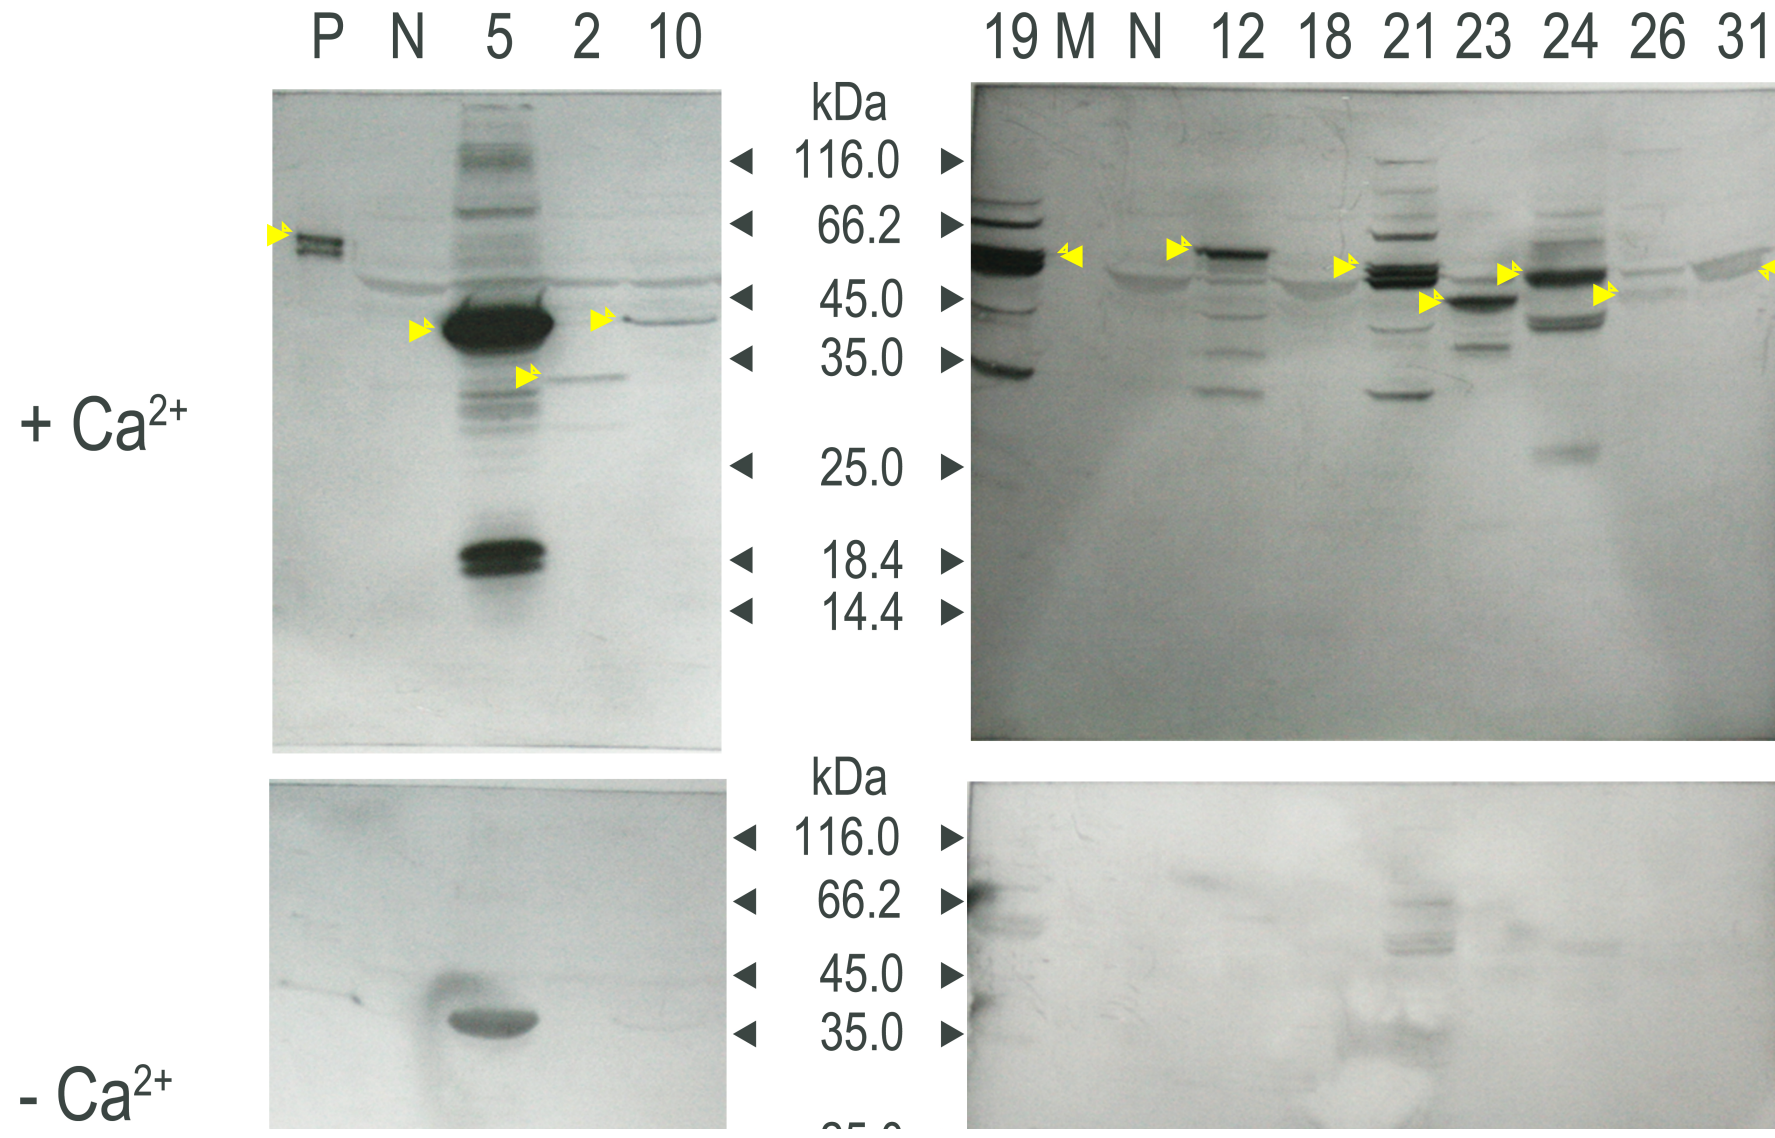

Supplement: 12870_2018_1538_MOESM5_ESM.pdf [file 12870_2018_1538_MOESM5_ESM.pdf]
